# Supplementary material for: Raccoon roundworm prevalence (Baylisascaris procyonis) at the North Carolina Zoo, USA
Source: PeerJ. 2020 Jul 20;8:e9426. doi: 10.7717/peerj.9426 (PMC7377244; doi:10.7717/peerj.9426)
Supplement: Supplemental Information 1 — NE- not examined, NA- not applicable. [file peerj-08-9426-s001.xlsx]

## Sheet: Sheet1
	Date	Location	x	y	Substrate	# Samples	Fecal Float	Exhibit	Public	Persist
1	2018	ZOG Rock	-79.7544	35.6231	Rock	2	Neg	Yes		NE
2	2018	ZOG Wall backside	-79.7536	35.6236	Cement	3	Neg	Yes		NE
3	2018	Elephant Rock	-79.7528	35.6239	Rock	3	Neg	Yes		No
4	2018	Lemur Wall	-79.7553	35.6258	Cement	1	Neg	yes		No
5	2018/19	Pavilion Rock	-79.7536	35.6269	Rock	1 & 2	Neg	No		yes
6	2018	Hoofstock Barn 1	-79.7489	35.6236	Barn	1	Neg	yes		no
7	2018	Hoofstock Barn 2	-79.7486	35.6242	Barn	1	Neg	yes		no
8	2018/19	Hoofstock Barn 3	-79.7483	35.6244	Barn	1 & 2	Neg	Yes		yes
9	2018/19	Hoofstock Barn B	-79.7494	35.6231	Barn	3 & 2	Neg	No		yes
10	2018/19	Africa Plains Log	-79.7506	35.6261	Log	3 & 1	Neg	Yes		yes
11	2018/19	Africa Plains Culvert	-79.7514	35.6264	Cement	1 & 2	Neg	yes		yes
12	2018/19	Africa Termite Mound	-79.7517	35.6286	Cement	1 & 3	Neg	Yes		yes
13	2018/19	Africa Bridge	-79.7547	35.6214	Bridge	1 & 1	Neg	No	yes	yes
14	2018/19	Education Center Rock	-79.7644	35.6281	Rock	3 & 3	Neg	No		yes
15	2018/19	Marsh Walk Rock	-79.7636	35.6297	Rock	3 & 3	Neg	No		yes
16	2018	Paddleboat ground	-79.7628	35.6294	Ground	1	Neg	No		no
17	2018	Tree Base Rocky Coast 1	-79.7622	35.6303	Gound	3	Neg	No		no
18	2018/19	Tree Base Rocky Coast 2	-79.7625	35.63	Ground	3 & 1	Neg	No		yes
19	2018	Compost Lake Rock	-79.7486	35.6203	Rock	1 & 1	Neg	No		yes
20	2018	Prairie Wall	-79.7597	35.6317	Wall	1	Neg	Yes		no
21	2018/19	Prairie Rock 1	-79.7586	35.6317	Rock	3 & 2	Neg	Yes		no
22	2018	Prairie Rock 2	-79.7589	35.6314	Rock	3	Neg	Yes		yes
23	2018	Prairie Stump	-79.7592	35.6317	Stump	2	Neg	Yes		no
24	2018/19	Swamp Log	-79.7647	35.6314	Log	1 & 1	Neg	No		yes
25	2018/19	Rotten Swamp Log	-79.7647	35.6319	Log	3 & 1	Neg	No		yes
26	2018	African Plains Viewing Rock	-79.7524	35.6284	Rock	1	Neg	No		no
27	2018	ZOG wall Giraffe Deck Wall	-79.7533	35.6247	Gound	2	Neg	Yes		no
28	2018/10	Babboon Pavilion Deck	-79.7533	35.6272	Deck	3 & 2	Neg	No		yes
29	2019	Grizzly Roof	-79.7567	35.63	Roof	1	Neg	No		NE
30	2018	Elk Barn ladder	-79.7576	35.6319	Barn	1	Neg	Yes		no
31	2018/19	Elk Barn Roof	-79.7578	35.6321	Roof	3 & 2	Neg	No		yes
32	2018	Black Bear Roof	-79.7606	35.6323	Roof	1	Neg	Yes		NE
33	2018	Shack Ground	-79.7636	35.633	Ground	1	Neg	No		no
34	2019	Africa Plains North 1	-79.7521	35.6302	Rock	2	Neg	Yes		NA
35	2019	Africa Plains North 2	-79.7516	35.6299	Rock	3	Neg	Yes		NA
36	2019	Africa Log Across HS Barn	-79.7478	35.6232	Tree	1	Neg	Yes		NA
37	2019	Pavilion Corner	-79.7527	35.6269	Ground	3	Neg	No		NA
38	2019	Kid Zone	-79.7617	35.6306	Wood	1	Neg	No	yes	NA
39	2019	Rock b/w PB & PB	-79.7631	35.6296	Rock	2	Neg	No		NA
40	2019	Black Bear	-79.7606	35.632	Cement	2	Neg	Yes		NA
41	2019	Hole in tree	-79.7701	35.6332	Ground	1	Neg	No		NA

## Sheet: Sheet2
Barn/Roof/Deck		11
Wood		5
Rock		12
Cement		6
Gound		7
Manmade		17
Environment		24
